# Supplementary material for: The repertoire of testicular extracellular vesicle cargoes and their involvement in inter-compartmental communication associated with spermatogenesis
Source: PubMed Central journal article supplement (PMC8966158; doi:10.1186/s12915-022-01268-5), 2022-03-29
Supplement: 12915_2022_1268_MOESM1_ESM.pdf [file 12915_2022_1268_MOESM1_ESM.pdf]

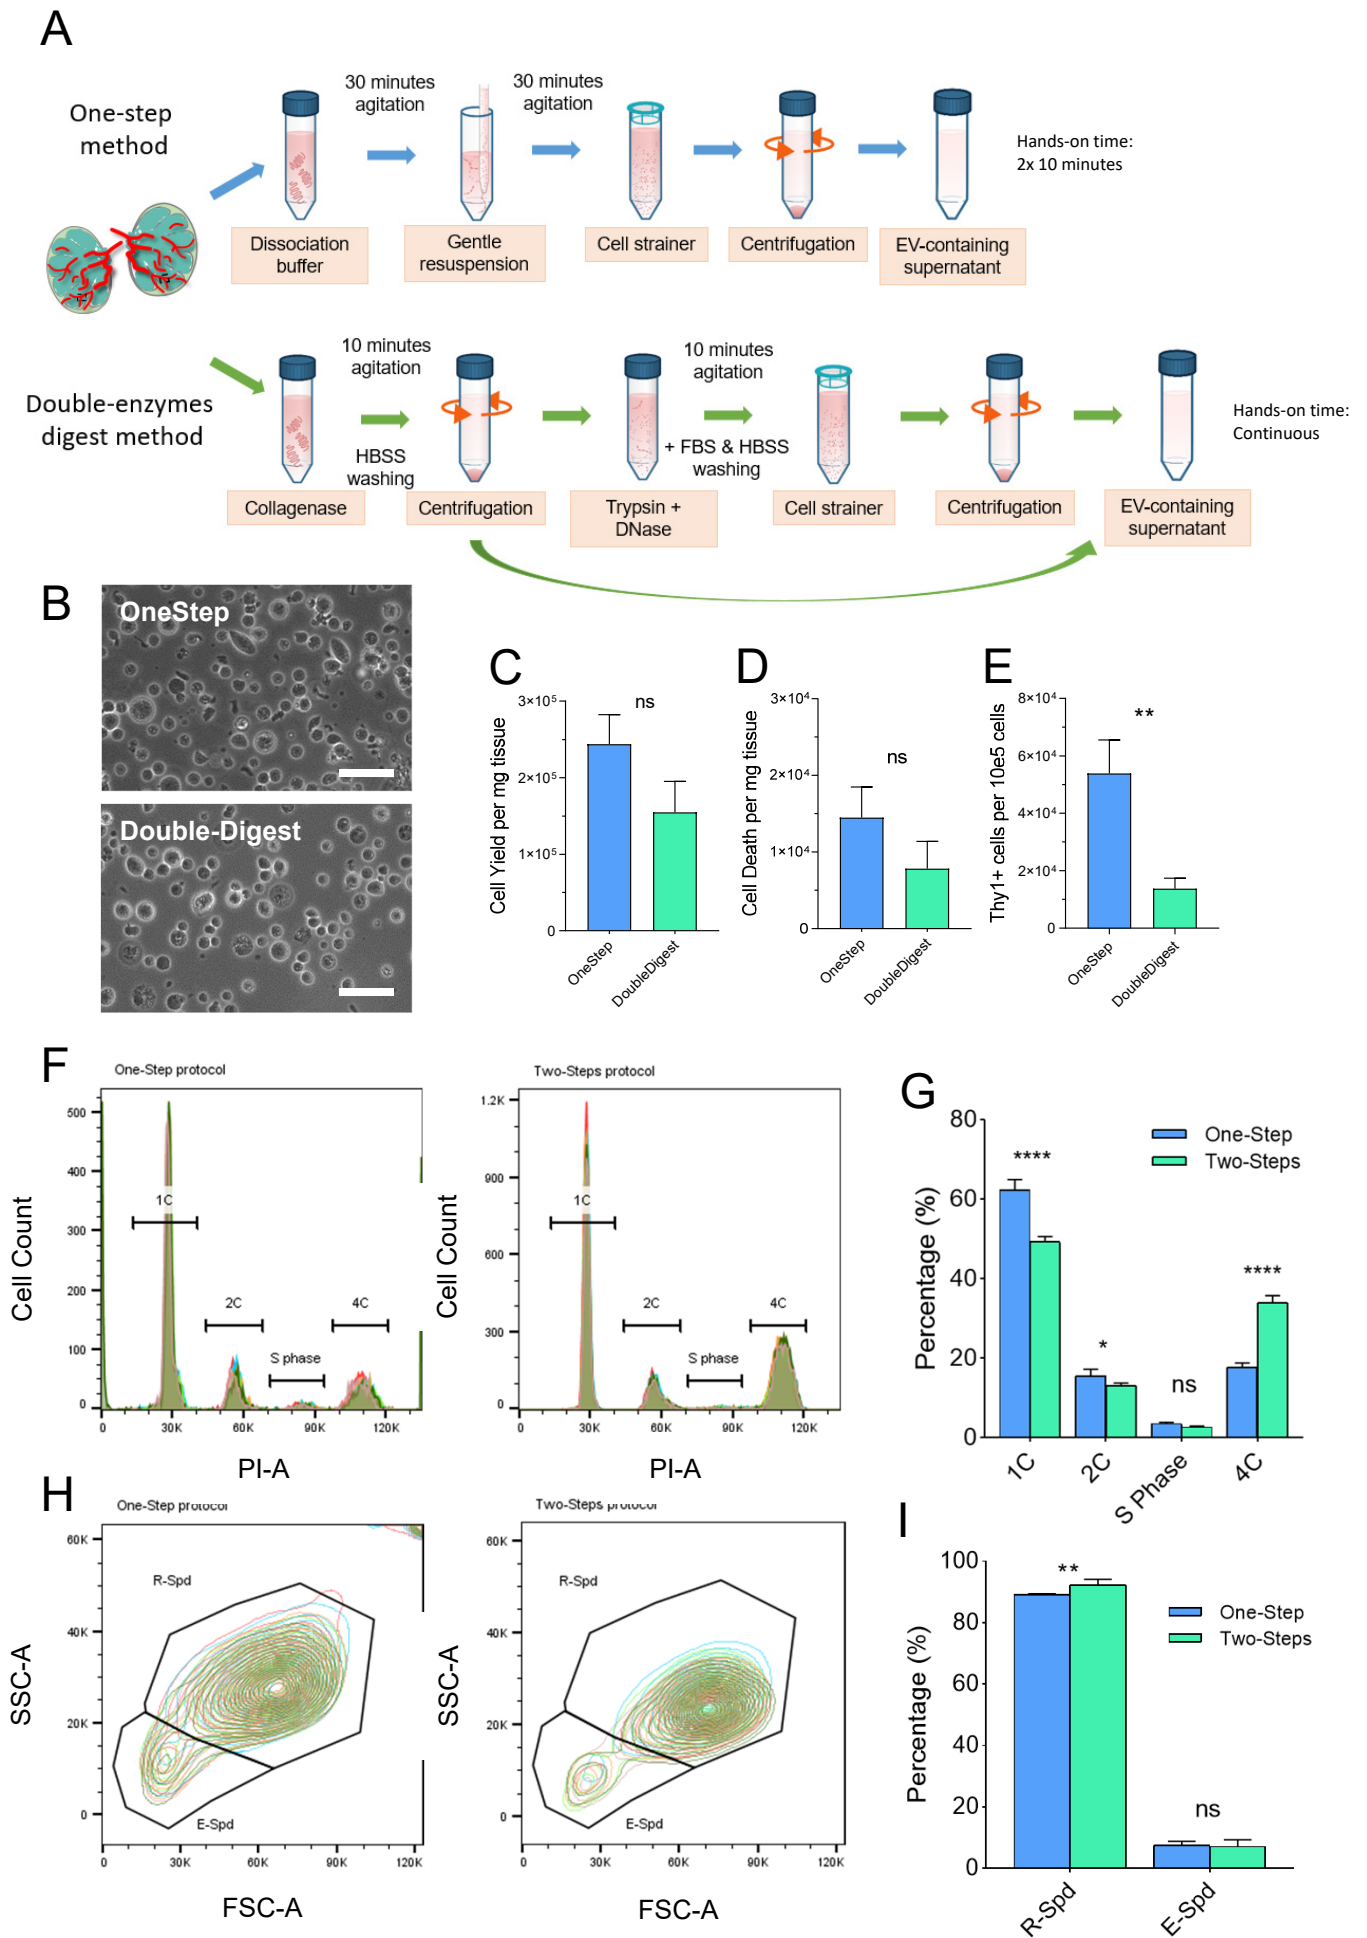

**Additional File 1: Fig. S1| Comparison of one-step and double-enzyme digestion methods for mouse testis dissociation.**

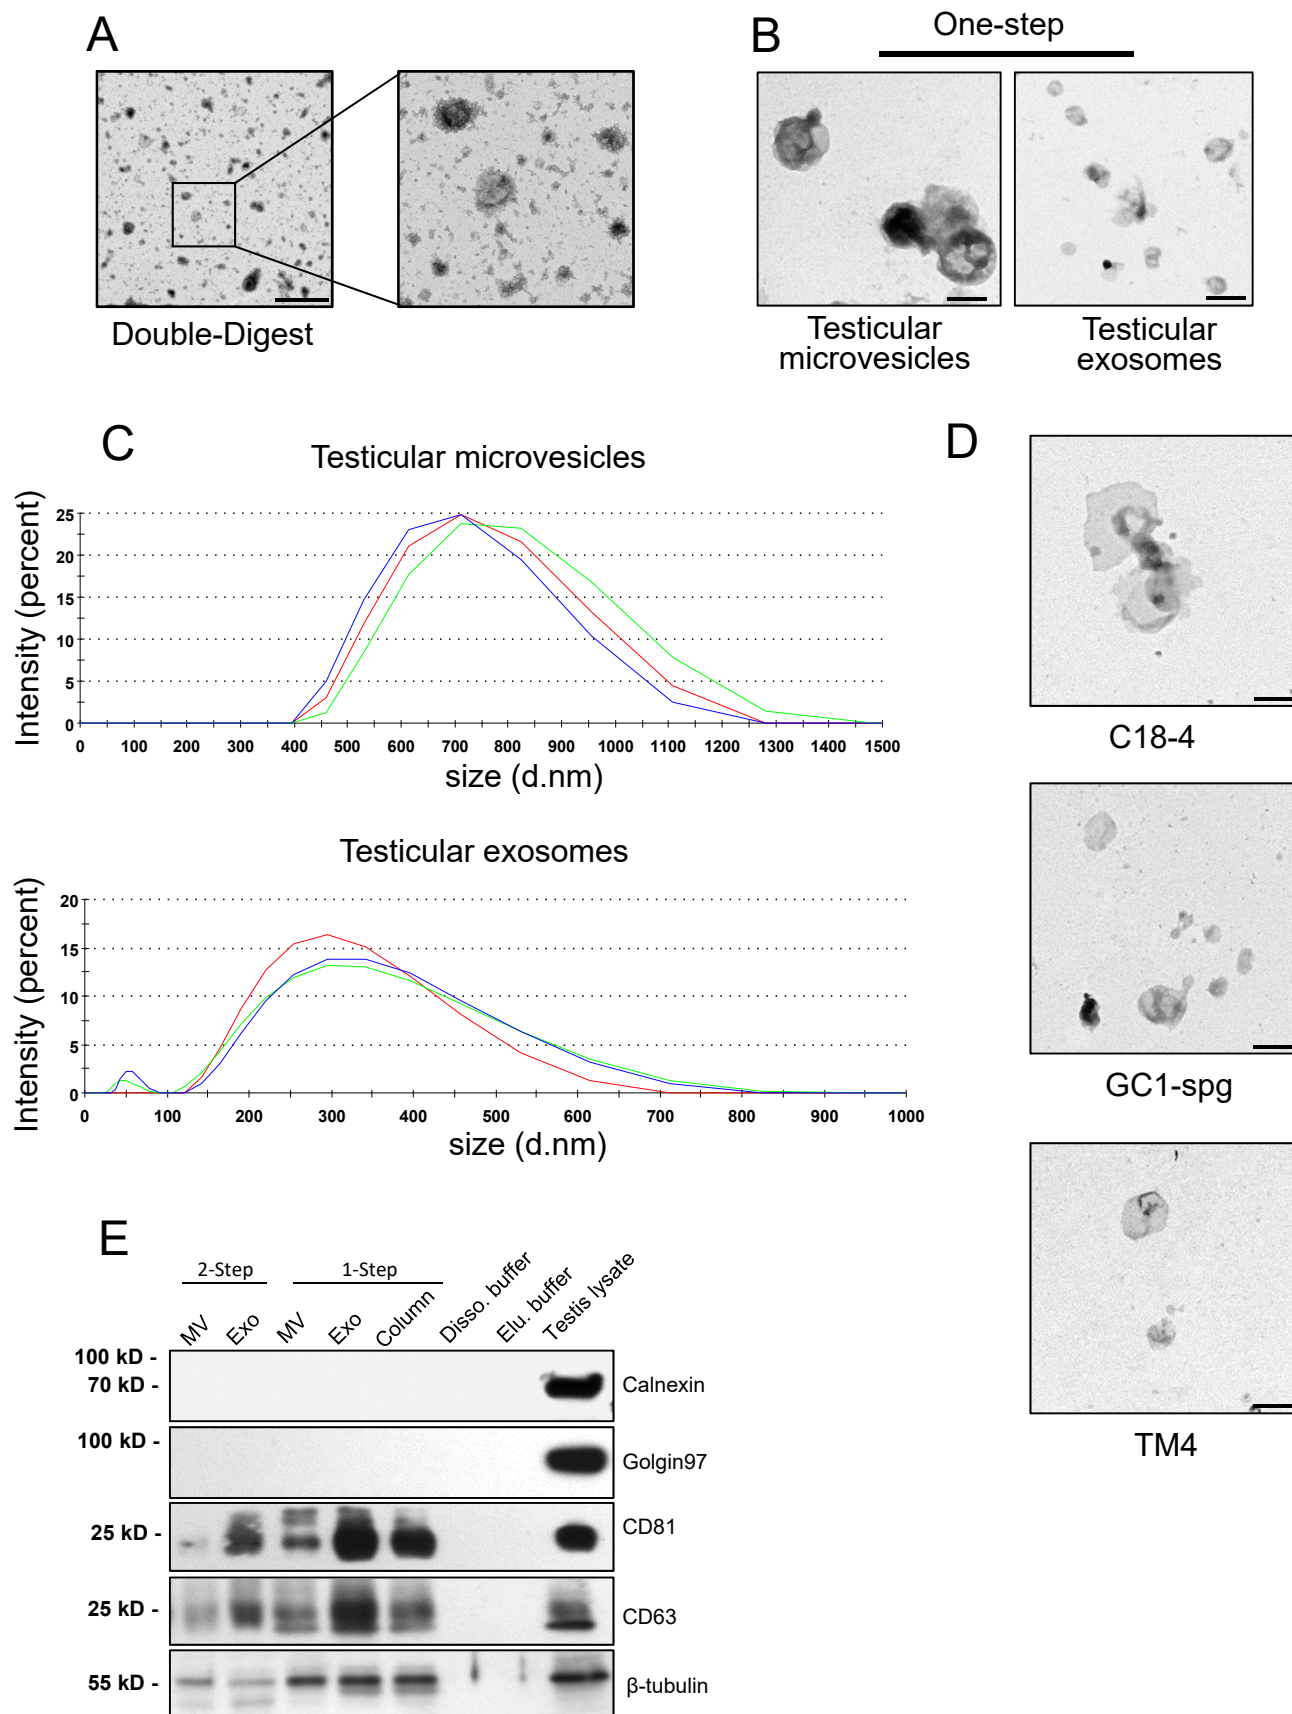

**Additional File 1: Fig. S2| Isolation and characterization of extracellular vesicles in mouse testes and testicular cell lines**

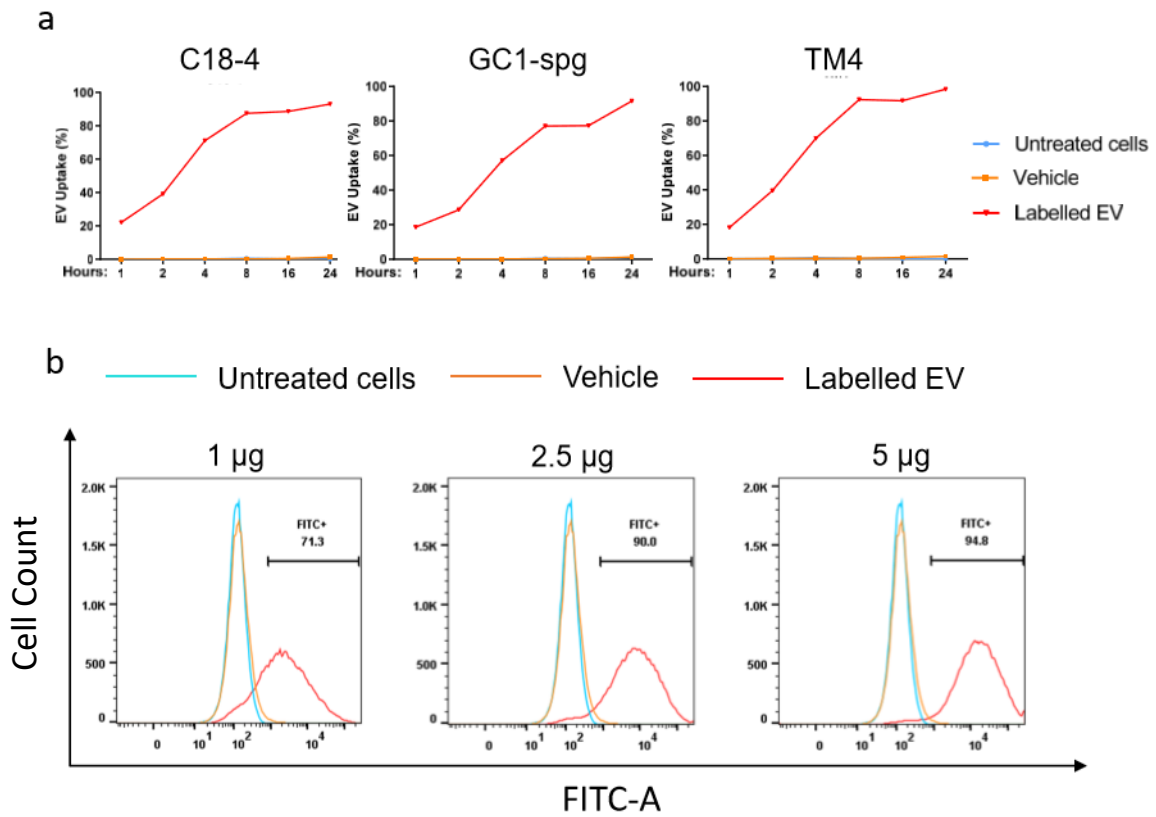

**Additional file 1: Fig. S3| Time and dose-dependent uptake of testicular extracellular vesicles by testicular cell lines.**

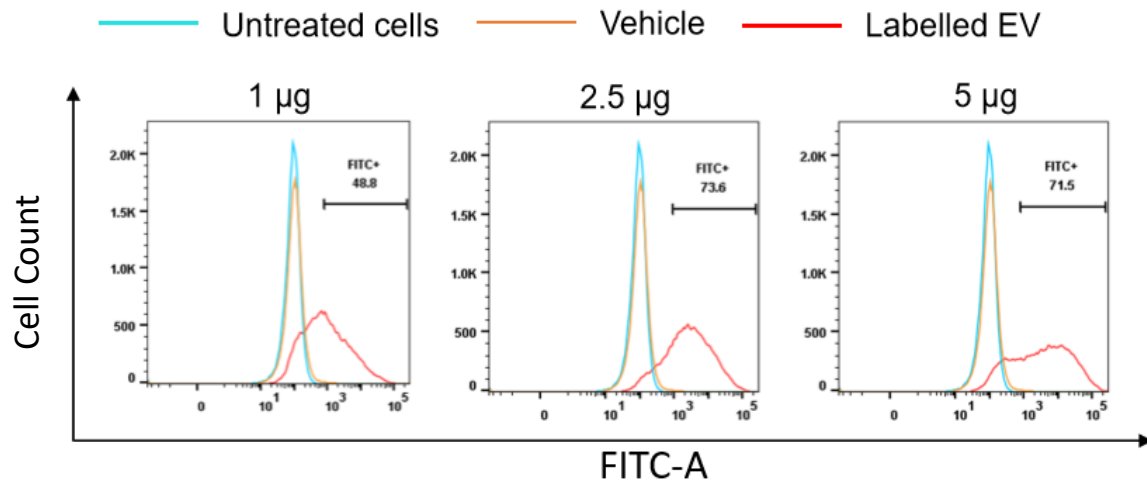

**Additional file 1: Fig. S4| Uptake of extracellular vesicles secreted from 293FT cells by C18-4 cells.**

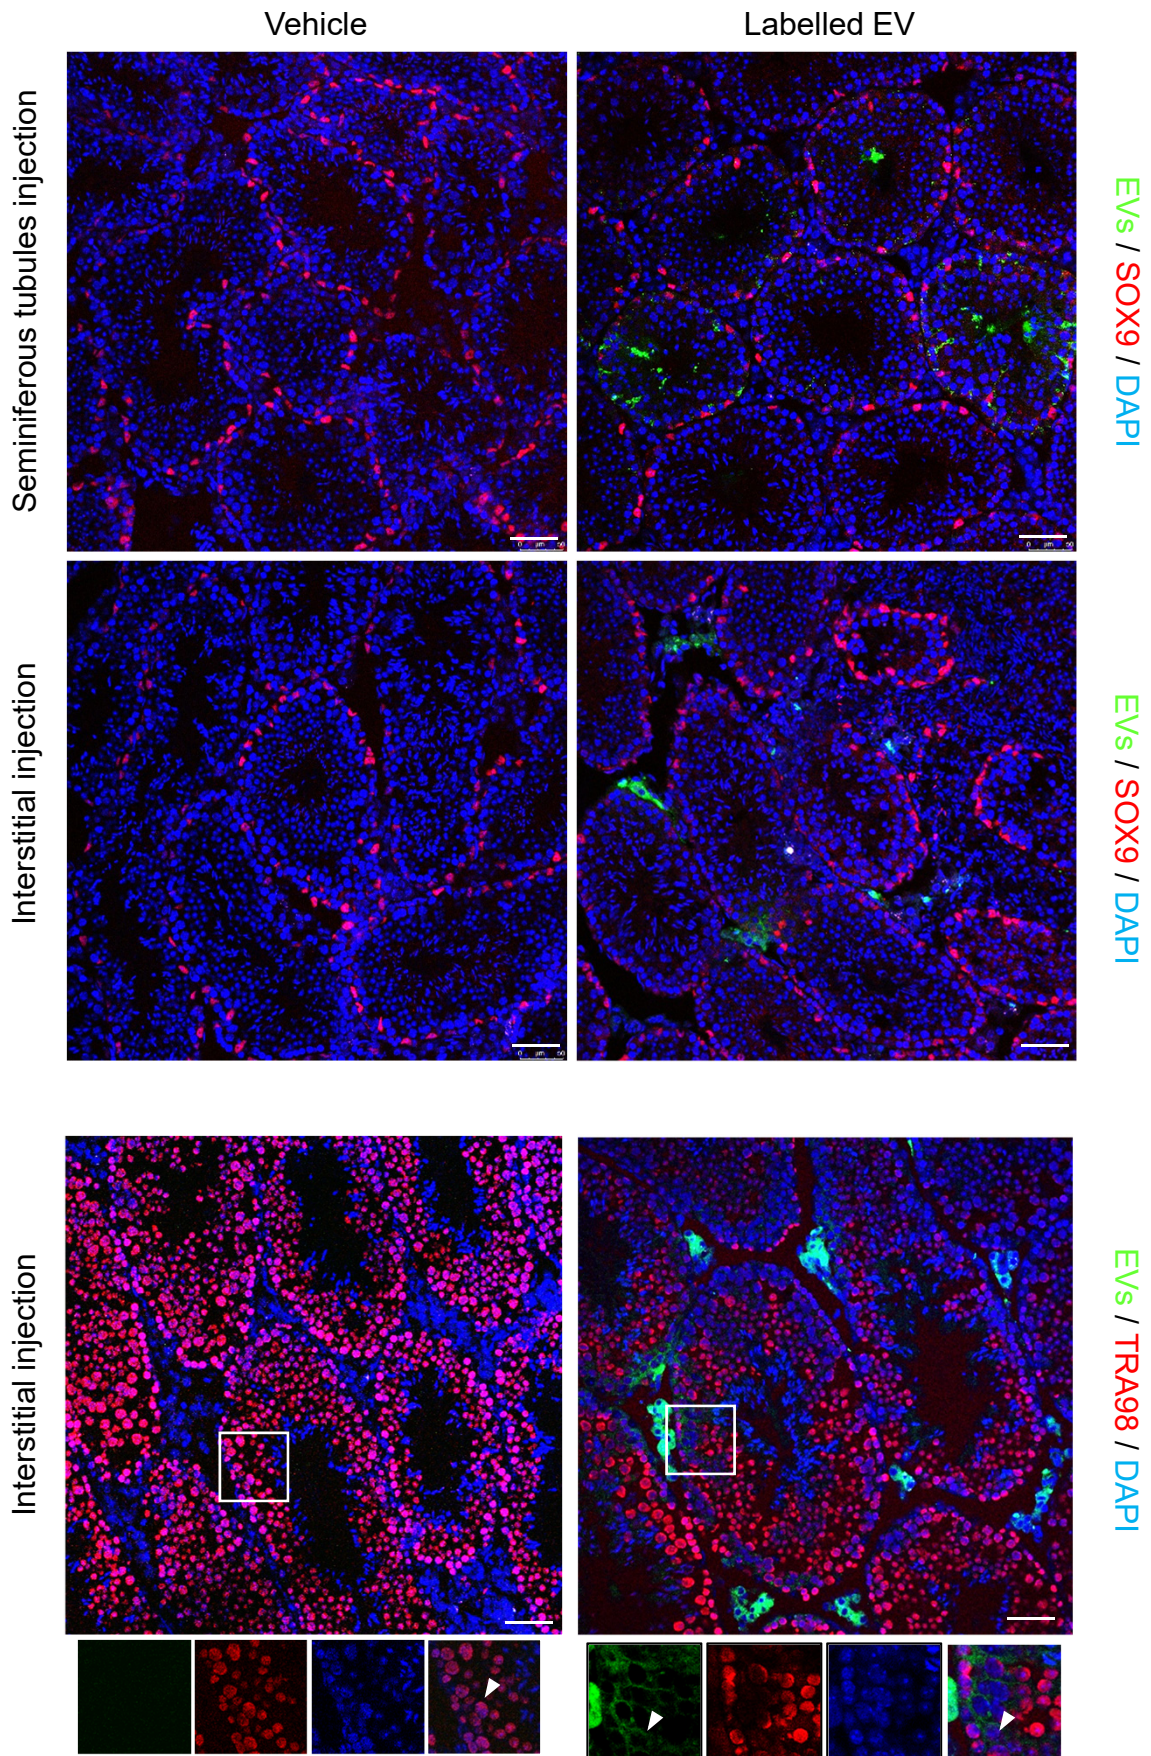

Additional file 1: Fig. S5| Uptake of testicular EVs in testicular cells of interstitial and seminiferous tubules compartments.

| <b>Gene name</b> | <b>Accession</b> | <b>Protein Name</b>                                               | <b>Phenotype information</b> |
|------------------|------------------|-------------------------------------------------------------------|------------------------------|
| <i>Slc2a3</i>    | P32037           | Solute carrier family 2, facilitated glucose transporter member 3 | Decrease litter size         |
| <i>Vdac3</i>     | Q60931           | Voltage-dependent anion-selective channel protein 3               | Male infertility             |
| <i>Gpx4</i>      | F7A8H6           | Glutathione peroxidase                                            | Male infertility             |
| <i>Slc25a3</i>   | Q8VEM8           | Phosphate carrier protein mitochondrial                           | Testis atrophy               |
| <i>Ace</i>       | P09470           | Angiotensin-converting enzyme                                     | Reduced male fertility       |
| <i>Sypl1</i>     | O09117           | Synaptophysin-like protein 1                                      | Male infertility             |
| <i>Gapdh</i>     | A0A0R4J0X7       | Glyceraldehyde-3-phosphate dehydrogenase                          | Male infertility             |
| <i>Atp2a2</i>    | O55143           | Sarcoplasmic/endoplasmic reticulum calcium ATPase 2               | Decrease litter size         |
| <i>Aqp7</i>      | O54794           | Aquaporin-7                                                       | Abnormal sperm               |
| <i>Bsg</i>       | P18572           | Basigin                                                           | Male infertility             |
| <i>Snrpe</i>     | P62305           | Small nuclear ribonucleoprotein E                                 | Testis atrophy               |

**Additional file 1: Fig. S6| Phenotype of male mice with knockout of genes encoding top proteins identified in testicular EVs.**

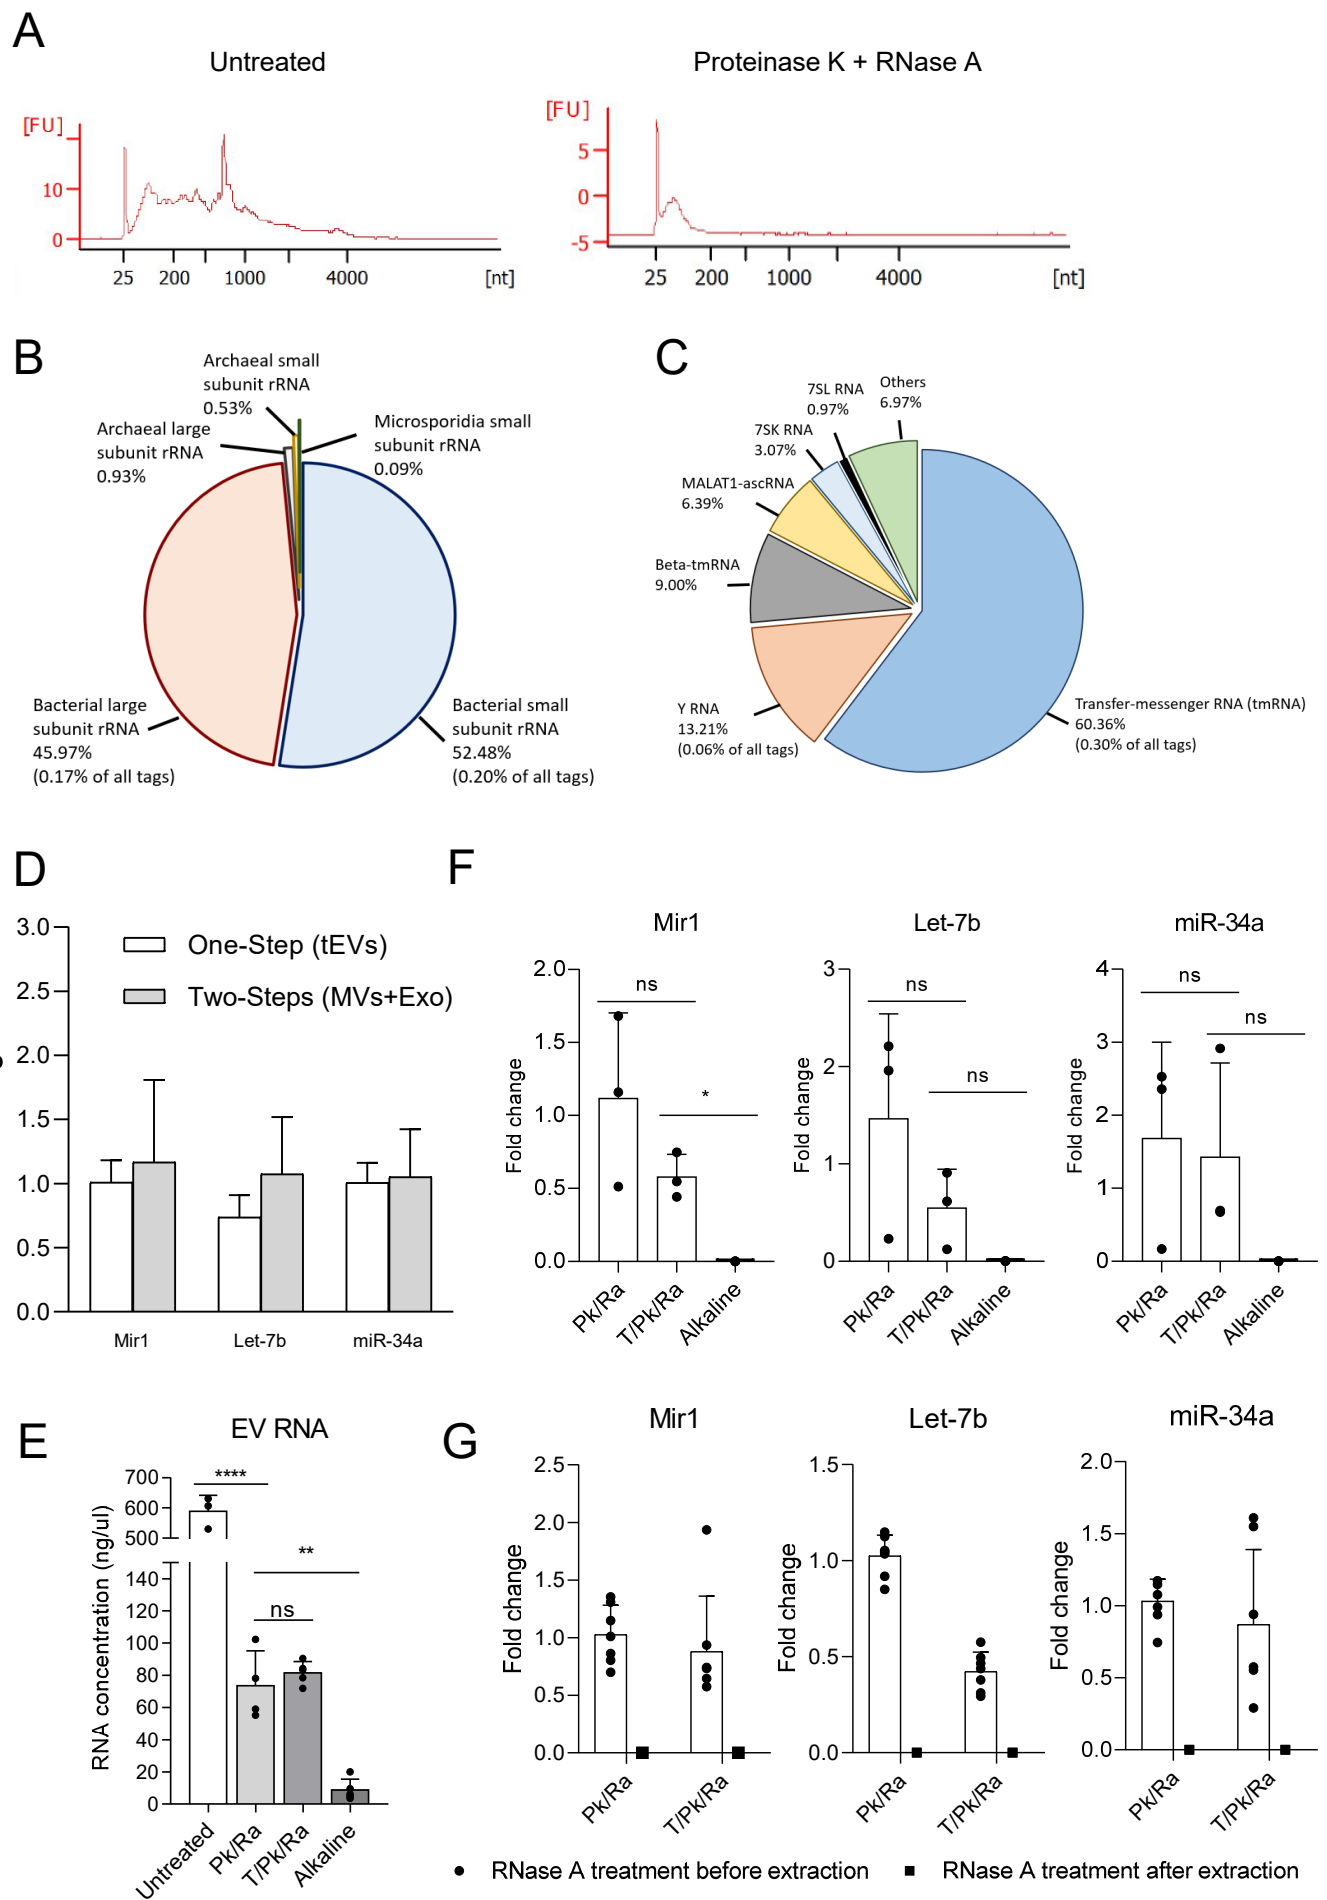

Additional file 1: Fig. S7| Characterization of the small RNA cargoes of testicular EVs.
