# Supplementary material for: The repertoire of testicular extracellular vesicle cargoes and their involvement in inter-compartmental communication associated with spermatogenesis
Source: PubMed Central journal article supplement (PMC8966158; doi:10.1186/s12915-022-01268-5), 2022-03-29
Supplement: 12915_2022_1268_MOESM7_ESM.pdf [file 12915_2022_1268_MOESM7_ESM.pdf]

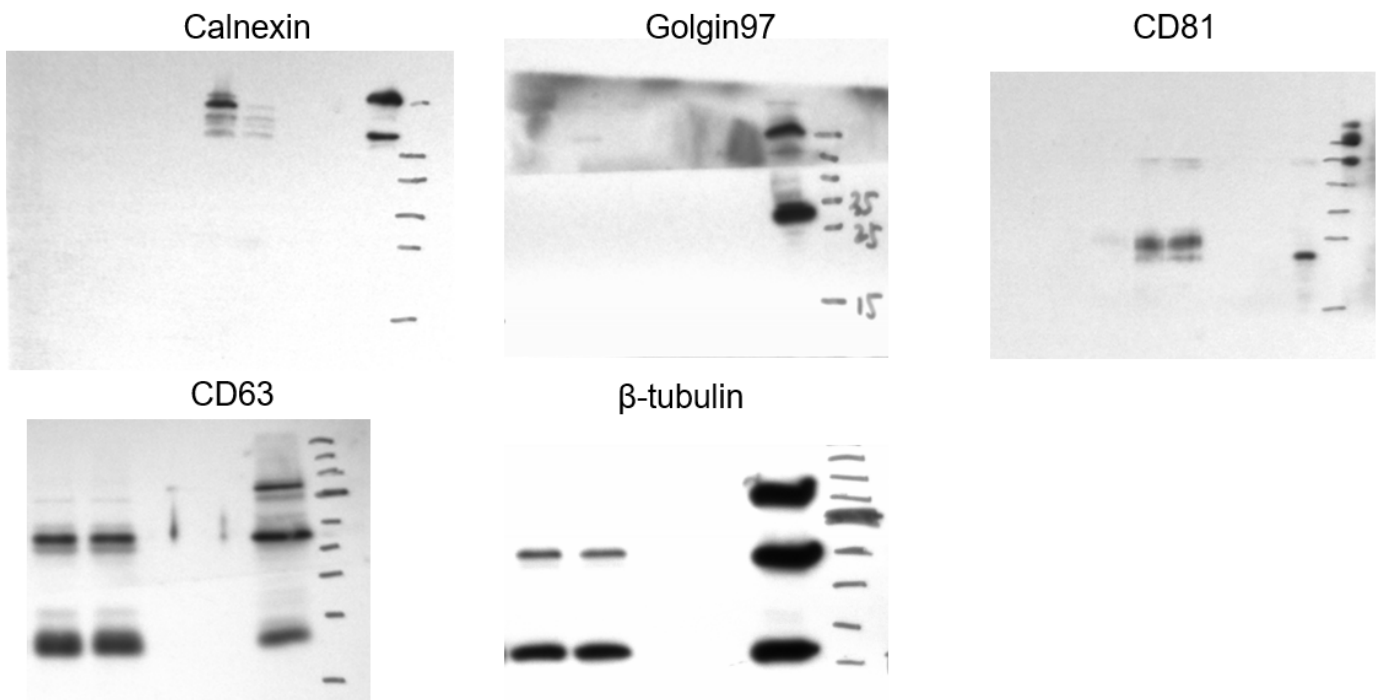

**Fig 1| Characterization of testicular extracellular vesicles and their involvement in cell communication in the testicular microenvironment**

BSG

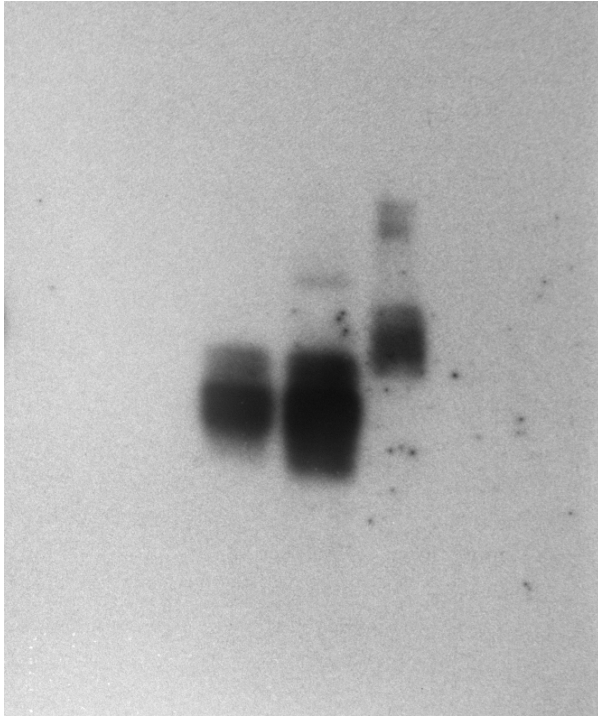

**Fig. 2| Protein signature of testicular extracellular vesicles.**

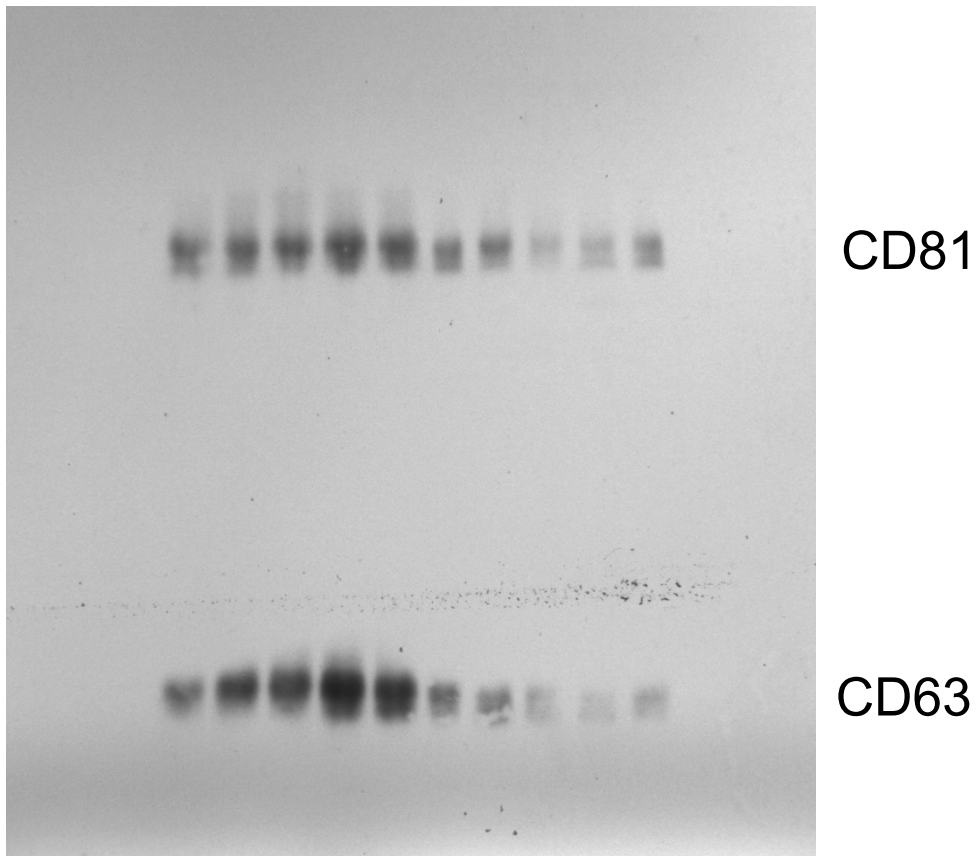

**Fig 4| Inhibition of testicular extracellular vesicles elevated testicular germ cell apoptosis in mice**

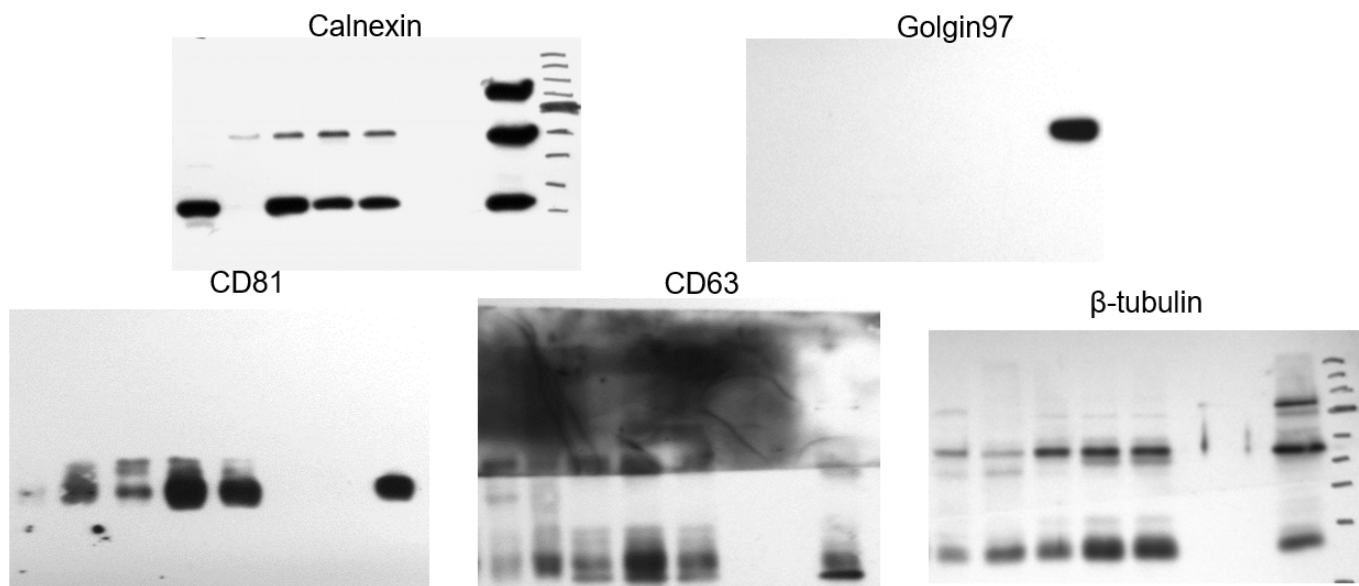

**Suppl Fig S2| Isolation and characterization of extracellular vesicles in mouse testes and testicular cell lines**
